# Supplementary material for: Jagged1-Notch1-deployed tumor perivascular niche promotes breast cancer stem cell phenotype through Zeb1
Source: PubMed Central journal article supplement (PMC7552407; doi:10.1038/s41467-020-18860-4), 2020-10-12
Supplement: 41467_2020_18860_MOESM1_ESM.pdf [file 41467_2020_18860_MOESM1_ESM.pdf]

**Supplementary Information**

**Jagged1-Notch1-deployed tumor perivascular niche promotes breast cancer stem cell phenotype through Zeb1**

Jiang et al.

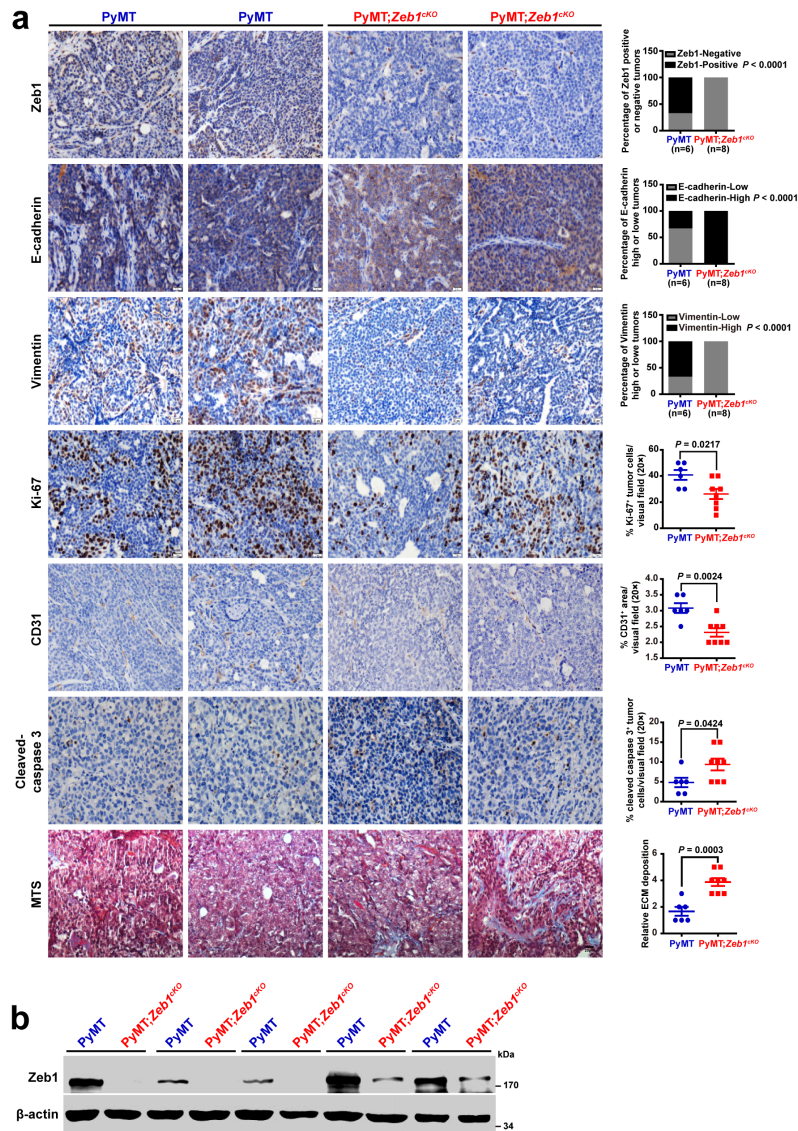

**Supplementary Figure 1: Characterization of differentiation markers in PyMT and PyMT;*Zeb1*<sup>CKO</sup> tumors. (a)** Representative images of immunohistochemical staining of Zeb1, E-cadherin, Vimentin, Ki-67, CD31, and cleaved-caspase 3 in breast cancer tissue, and quantifications of the indicated markers. Specific blue MTS (Masson's trichrome staining) labels collagen fibers (n = 6 PyMT, 8 PyMT;*Zeb1*<sup>CKO</sup>). Indicated *P* values were calculated using two-sided Fisher's exact test or two-tailed unpaired Student's *t*-test. Scale bars, 20  $\mu$ m. **(b)** Protein levels for Zeb1 in EpCAM<sup>+</sup> tumor cells (n = 5 PyMT, 5 PyMT;*Zeb1*<sup>CKO</sup>). Data are presented as mean  $\pm$  SEM in **a**. Dots depict individual samples in **a**. Data are representative of at least five (**a**, **b**) independent experiments.

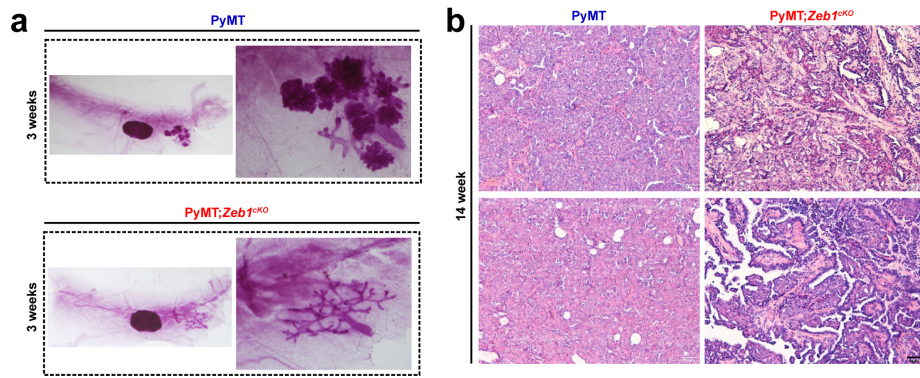

**Supplementary Figure 2: Histological analysis of PyMT and PyMT;*Zeb1*<sup>CKO</sup> tumors.** (a) Representative alum carmine-stained whole mount mammary outgrowths from PyMT and PyMT;*Zeb1*<sup>CKO</sup> mice at the indicated ages (n = 5 PyMT, 5 PyMT;*Zeb1*<sup>CKO</sup>). (b) Representative haematoxylin and eosin (HE)-stained sections for the grading of the respective tumors (n = 5 PyMT, 5 PyMT;*Zeb1*<sup>CKO</sup>). Scale bars, 50  $\mu$ m.

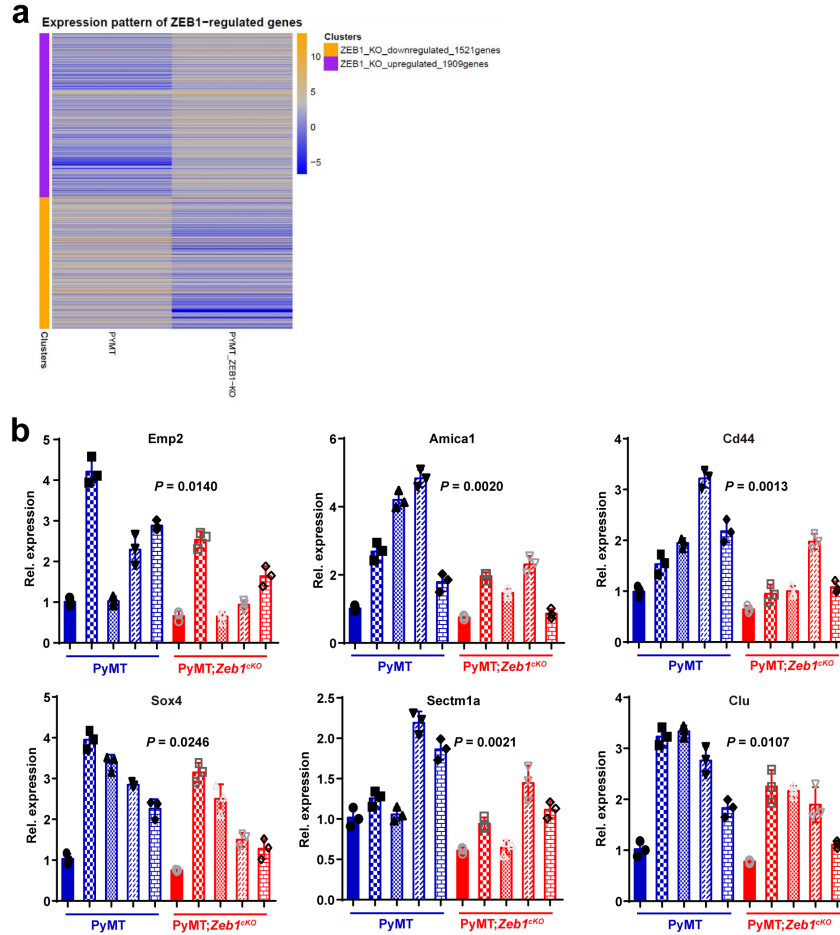

**Supplementary Figure 3: Depletion of *Zeb1* affects the transcriptomes of PyMT;*Zeb1*<sup>CKO</sup> and PyMT cells.** (a) Differentially expressed genes in global gene-expression analysis from PyMT;*Zeb1*<sup>CKO</sup> vs. PyMT cells. (b) Relative mRNA levels for stemness-enrichment genes ( $n = 5$  PyMT, 5 PyMT;*Zeb1*<sup>CKO</sup>). Indicated  $P$  values were calculated using two-tailed unpaired Student's  $t$ -test in b. Data are presented as mean  $\pm$  SEM in b. Data are representative of five (b) independent experiments.



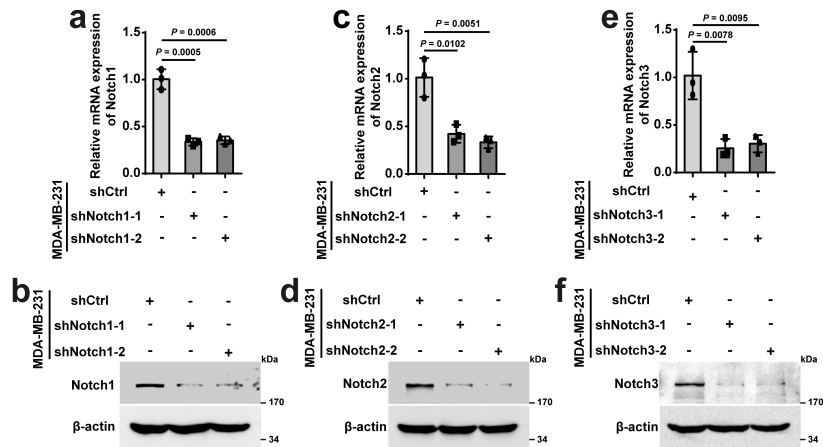

**Supplementary Figure 4: The knockdown efficiency of Notch1, Notch2 and Notch3 in MDA-MB-231 cells.** (a-f) MDA-MB-231 cells were stably transfected with the specific shRNA targeting Notch1, Notch2 or Notch3. The expression of Notch1, Notch2 and Notch3 were verified by quantitative PCR (a, c, e) and immunoblotting (b, d, f) and normalized to the levels of  $\beta$ -actin. Indicated *P* values were calculated using two-tailed unpaired Student's *t*-test in a, c, e. Data are presented as mean  $\pm$  SEM in a, c, e. Data are representative of three (a-f) independent experiments.

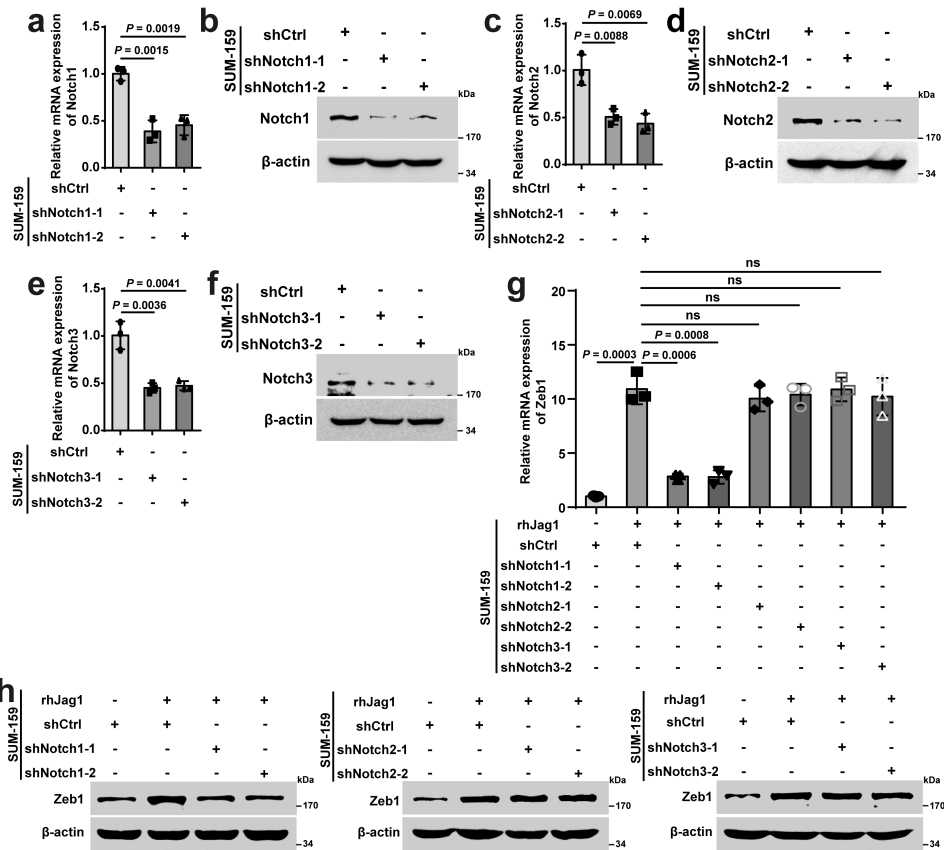

**Supplementary Figure 5: Notch1 activation upregulates Zeb1 expression in SUM-159 cells.** (a-f) SUM-159 cells were stably transfected with the specific shRNA targeting Notch1, Notch2 or Notch3. The expression of Notch1, Notch2 and Notch3 were verified by quantitative PCR (a, c, e) and immunoblotting (b, d, f) and normalized to the levels of  $\beta$ -actin. (g-h) Relative mRNA (g) and protein (h) levels for Zeb1 in shNotch1-, shNotch2- or shNotch3-interfered SUM-159 cells after treatment with rhJag1. Indicated  $P$  values were calculated using two-tailed unpaired Student's  $t$ -test in a, c, e, g. Data are presented as mean  $\pm$  SEM in a, c, e, g. Data are representative of three (a-h) independent experiments.

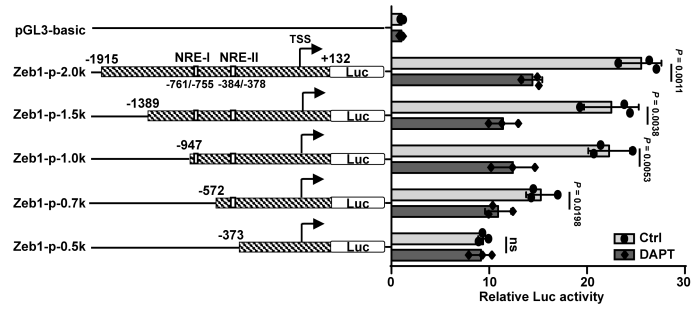

**Supplementary Figure 6: Notch1 inhibition decreases the transcriptional activity of Zeb1.** Luciferase assays for wild-type (-1915/+132) or truncated promoters of Zeb1 in MDA-MB-231 cells after treatment with DAPT. Indicated *P* values were calculated using two-tailed unpaired Student's *t*-test. Data are presented as means  $\pm$  SEM. Data are representative of three independent experiments.

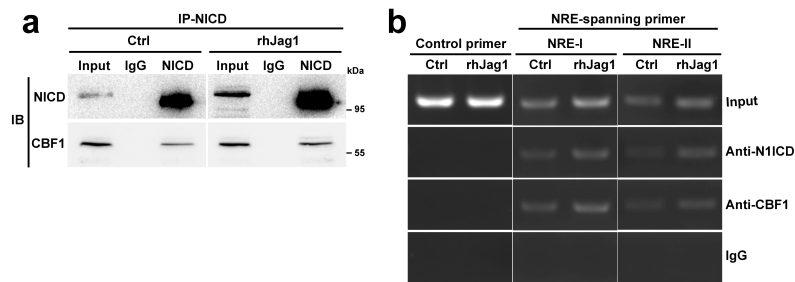

**Supplementary Figure 7: NICD recruits to the Zeb1 promoter in an NRE dependent manner by forming a complex with CBF1.** (a) The interactions between NICD and CBF1 protein were analyzed by co-immunoprecipitation in MDA-MB-231 in the presence or absence of rhJag1. (b) The association of NICD and CBF1 with the Zeb1 promoter was analyzed by ChIP assay. The amplified sequences of the Zeb1 promoter fragment containing NRE-I and NRE-II elements are shown. Input DNA amounts were confirmed by equal loading of chromatin. Data are representative of three (a, b) independent experiments.

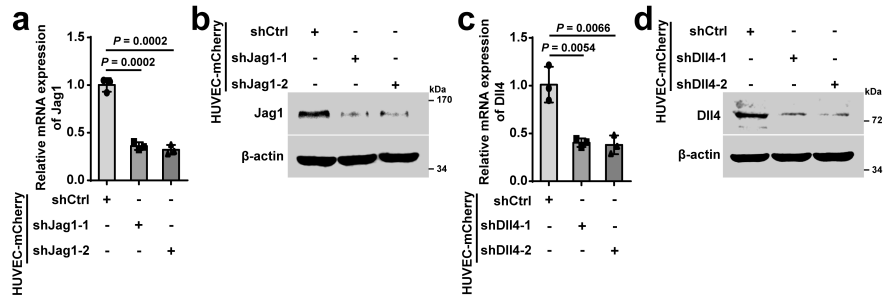

**Supplementary Figure 8: The knockdown efficiency of Jag1 and Dll4 in HUVEC-mCherry.** (a-d) HUVEC-mCherry were stably transfected with the specific shRNA targeting Jag1 or Dll4. The expression of Jag1 and Dll4 were verified by quantitative PCR (a, c) and immunoblotting (b, d) and normalized to the levels of  $\beta$ -actin. Indicated  $P$  values were calculated using two-tailed unpaired Student's  $t$ -test in a, c. Data are presented as mean  $\pm$  SEM in a, c. Data are representative of three (a-d) independent experiments.

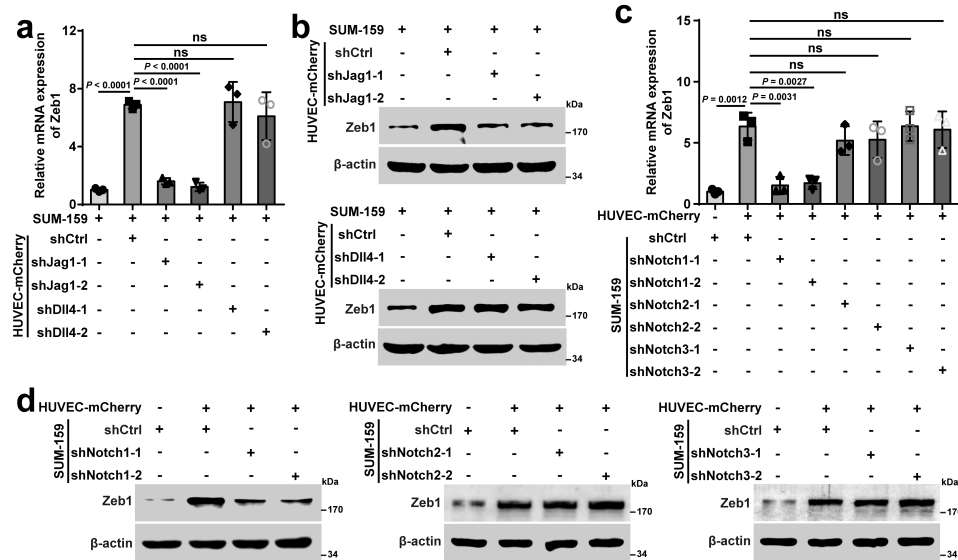

**Supplementary Figure 9: Endothelial Jag1 induces Notch1 activation in SUM-159 cells.** (a-b) Relative mRNA (a) and protein (b) levels for Zeb1 in SUM-159 cells that were cocultured with shJag1- or shDII4-interfered HUVEC-mCherry. (c-d) Relative mRNA (c) and protein (d) levels for Zeb1 in shNotch1-, shNotch2- or shNotch3-interfered SUM-159 cells that were cocultured with HUVECs. Indicated *P* values were calculated using two-tailed unpaired Student's *t*-test in a, c. Data are presented as mean ± SEM in a, c. Data are representative of three (a-d) independent experiments.



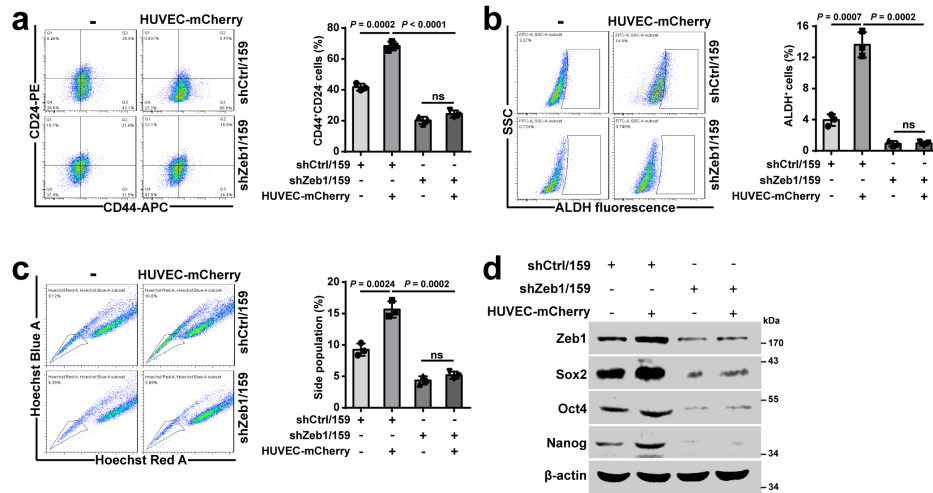

**Supplementary Figure 10: Endothelial Jag1 induced-activation Notch1 contributes to CSC phenotypes through a Zeb1-dependent mechanism in SUM-159 cells.** (a-c) Flow cytometry analysis for (a) CD44<sup>+</sup>CD24<sup>-</sup> population, (b) ALDH activity and (c) side-population assay in shCtrl- or shZeb1-interfered SUM-159 cells that were cocultured with HUVEC-mCherry. (d) Protein levels for Zeb1, Sox2, Oct4 and Nanog in shCtrl- or shZeb1-interfered SUM-159 cells that were cocultured HUVEC-mCherry. Indicated *P* values were calculated using two-tailed unpaired Student's *t*-test in a-c. Data are presented as mean ± SEM in a-c. Data are representative of three (a-d) independent experiments.

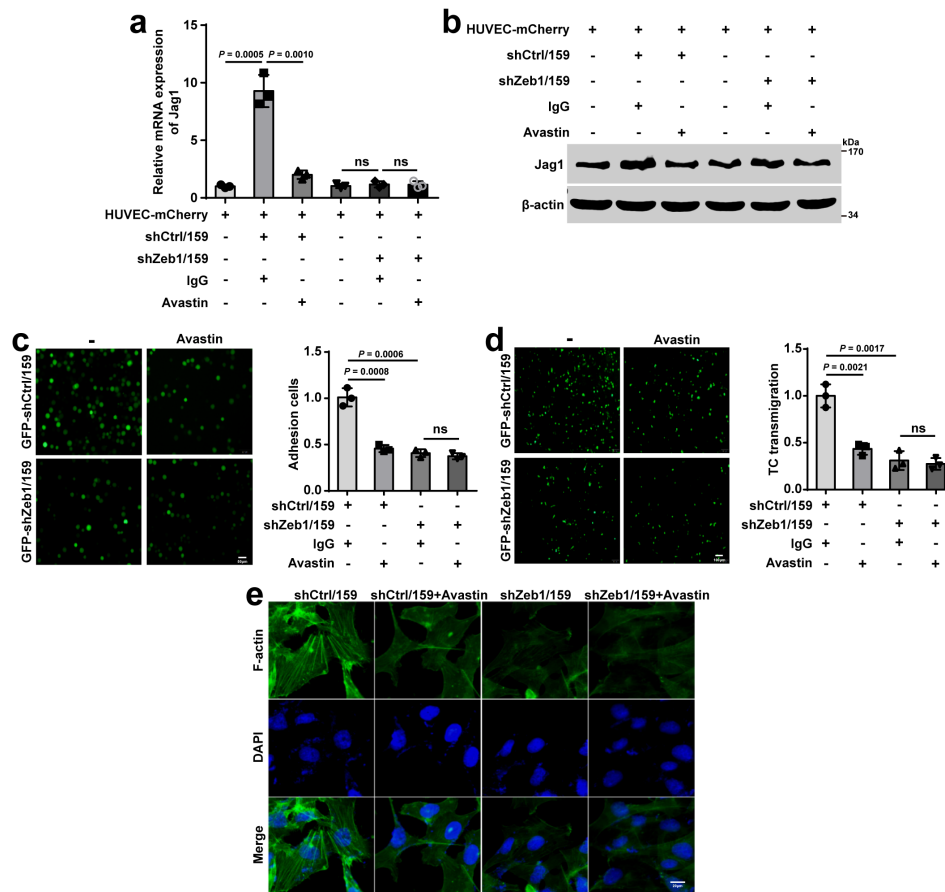

**Supplementary Figure 11: Depletion of Zeb1 impairs tumor-endothelial cell interaction through VEGFA in SUM-159 cells. (a-b)** Relative mRNA (a) and protein (b) levels for Jag1 in HUVEC-mCherry that were cocultured with shCtrl- or shZeb1-interfered SUM-159 cells in the presence of Avastin. (c) Tumor cell (shCtrl- or shZeb1-interfered SUM-159) adhesion to HUVEC monolayers in the presence of Avastin. Scale bar, 50  $\mu$ m. (d) Tumor cell (shCtrl- or shZeb1-interfered SUM-159) transmigration through HUVEC monolayers seeded on transwell inserts in the presence of Avastin. Scale bar, 100  $\mu$ m. (e) Immunofluorescent staining for Phalloidin of F-actin filaments in HUVECs after treatment with conditioned media derived from shCtrl- or shZeb1-interfered SUM-159 in the presence of Avastin. Scale bar, 20  $\mu$ m. Indicated *P* values were calculated using two-tailed unpaired Student's *t*-test in a, c, d. Data are presented as mean  $\pm$  SEM in a, c, d. Data are representative of three (a-e) independent experiments.

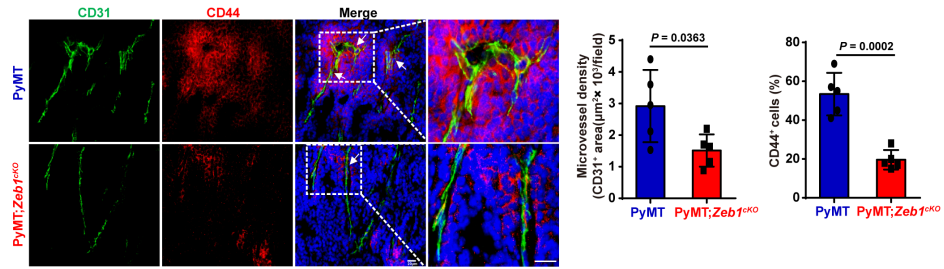

**Supplementary Figure 12: Depletion of Zeb1 subverts the tumor vascular niche.** Immunofluorescence staining for CD31 and CD44 in breast cancer tissue (n = 5 PyMT, 5 PyMT;*Zeb1*<sup>KO</sup>). The highlighted regions in the left panels are enlarged in the right panels. Scale bars, 20μm. Indicated *P* values were calculated using two-tailed unpaired Student's *t*-test. Data are presented as mean ± SEM. Dots depict individual samples. Data are representative of five independent experiments.

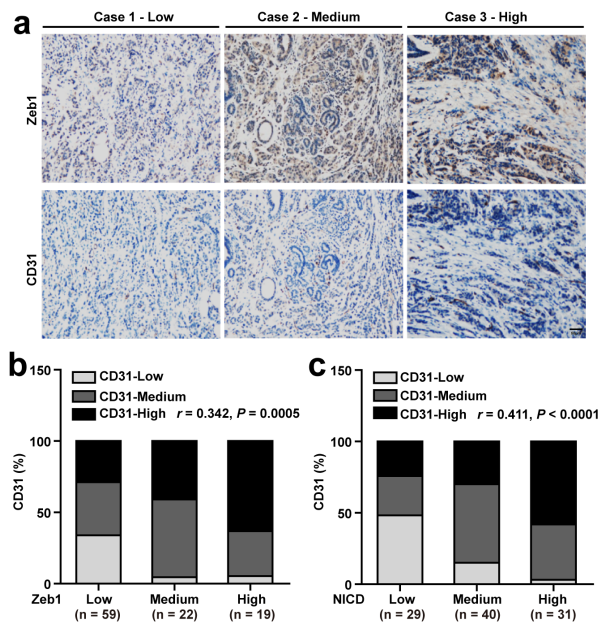

**Supplementary Figure 13: Zeb1 expression is positively correlated with tumor angiogenesis in aggressive human breast cancer.** (a) Representative images of immunohistochemical staining of Zeb1 and CD31 in serial sections of the same tumor ( $n = 100$ ). Scale bars,  $50 \mu\text{m}$ . (b) A positive correlation between the expression of Zeb1 and CD31 in the 100 human breast cancer samples. (c) A positive correlation between the expression of NICD and CD31 in breast cancer. Indicated  $P$  values were calculated using Spearman's rank correction test in b, c.

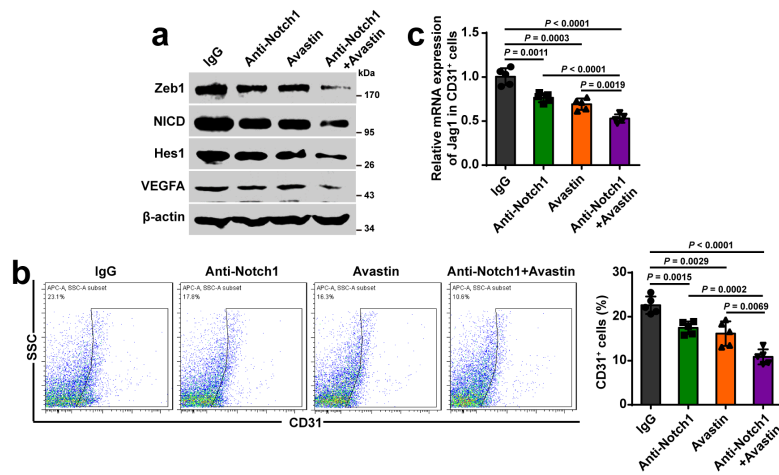

**Supplementary Figure 14: Combinatorial treatment of anti-Notch1 and Avastin synergistically reduces tumor angiogenesis. (a)** Protein levels for Zeb1, NICD, VEGFA and Hes1 in EpCAM<sup>+</sup> tumor cells from tumor tissue (n = 5). **(b)** Flow cytometry analysis for CD31<sup>+</sup> endothelial cell fraction; n = 5. **(c)** Relative mRNA levels for Jag1 in CD31<sup>+</sup> endothelial cells; n = 5. Indicated *P* values were calculated using two-tailed unpaired Student's *t*-test in **b, c**. Data are presented as mean ± SEM in **b, c**.

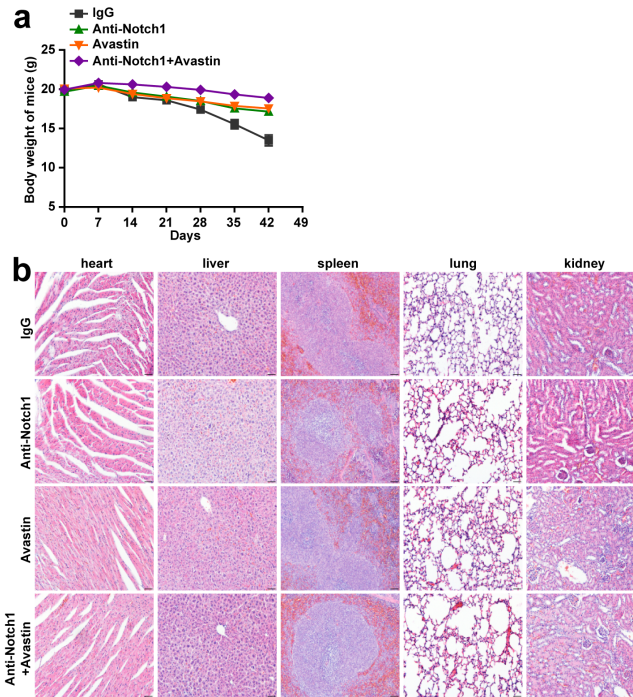

**Supplementary Figure 15: Combinatorial treatment of anti-Notch1 and Avastin synergistically has no significantly adverse effects. (a)** Body weight of BALB/c mice coinjected with MDA-MB-231 and HUVECs following treatment with IgG, anti-Notch1, Avastin, or both anti-Notch1 and Avastin; n = 5. **(b)** Representative haematoxylin and eosin (HE)-stained sections of heart, liver, spleen, lung and kidney from mice with the indicated treatment; n = 5. Scale bars, 50  $\mu$ m.



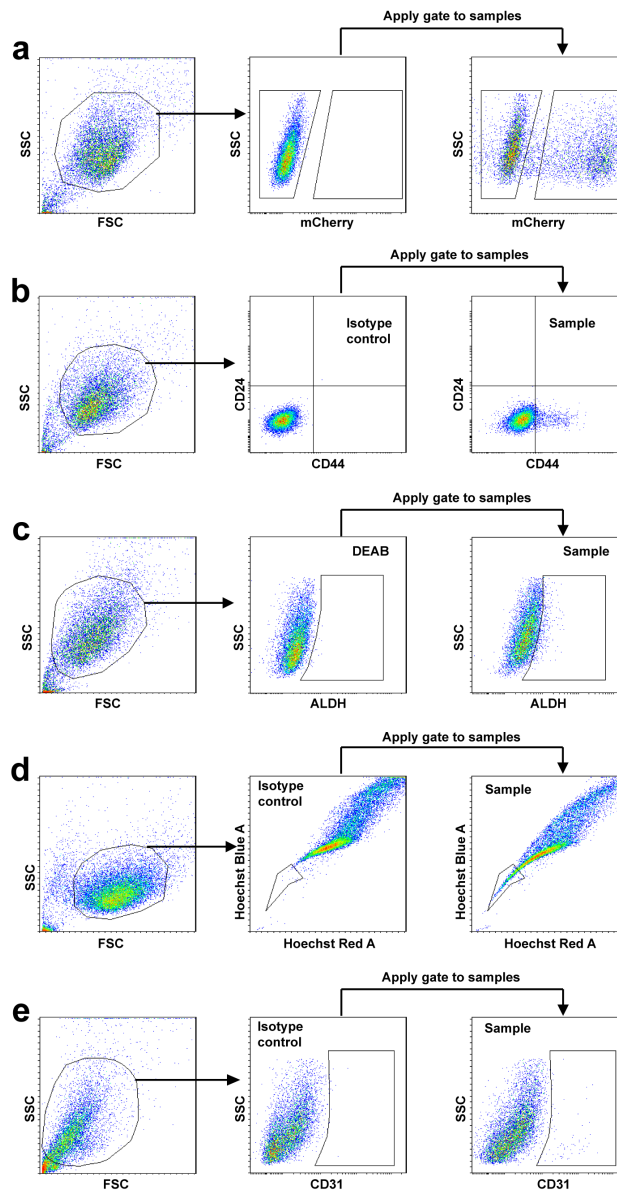

**Supplementary Figure 16: Gating strategy for flow cytometer.** Gating strategies of flow cytometry analysis for HUVEC-mCherry (**a**), CD44<sup>+</sup>CD24<sup>-</sup> population (**b**), ALDH<sup>+</sup> cells (**c**), Side population (**d**) and CD31<sup>+</sup> cells (**e**). SSC = Side Scatter, FSC = Forward Scatter.

**Supplementary Table 1: Zeb1 promoter activity in response to siRNA interference of human growth factors and receptors.**

(*P* value vs. the respective control by two-tailed unpaired Student's *t*-test)

|                              | <b>Gene name</b>                            | <b>Abbreviation</b> | <b>Fold-change</b> | <b><i>P</i> value</b> |
|------------------------------|---------------------------------------------|---------------------|--------------------|-----------------------|
| <b>Downregulated Genes</b>   | NOTCH1                                      | NOTCH1              | 0.19               | 0.001                 |
|                              | Wnt Family Member 7A                        | WNT7A               | 0.57               | 0.004                 |
|                              | Wnt Family Member 3                         | WNT3                | 0.60               | 0.009                 |
|                              | Wnt Family Member 4                         | WNT4                | 0.62               | 0.038                 |
|                              | C-C Motif Chemokine Ligand 18               | CCL18               | 0.66               | 0.036                 |
|                              | Interleukin 18                              | IL18                | 0.69               | 0.030                 |
|                              | Interleukin 1 Beta                          | IL1B                | 0.70               | 0.042                 |
|                              | Wnt Family Member 3A                        | WNT3A               | 0.74               | 0.024                 |
|                              | C-C Motif Chemokine Ligand 21               | CCL21               | 0.84               | 0.017                 |
|                              | Interleukin 1 Family Member 10 (Theta)      | IL1F10              | 0.86               | 0.033                 |
|                              | Interleukin 36, Alpha                       | IL1F6               | 0.88               | 0.028                 |
| <b>Upregulated Genes</b>     | Interleukin 13                              | IL13                | 2.69               | 0.000                 |
|                              | Intercellular Adhesion Molecule 2           | ICAM2               | 2.27               | 0.000                 |
|                              | Interleukin 6                               | IL6                 | 2.12               | 0.000                 |
|                              | Interleukin 23 Subunit Alpha                | IL23A               | 2.01               | 0.002                 |
|                              | Interleukin 5                               | IL5                 | 2.00               | 0.000                 |
|                              | Interleukin 1 Receptor Antagonist           | IL1RN               | 1.92               | 0.010                 |
|                              | Interleukin 3                               | IL3                 | 1.83               | 0.010                 |
|                              | Fibroblast Growth Factor 9                  | FGF9                | 1.72               | 0.001                 |
|                              | Intercellular Adhesion Molecule 4           | ICAM4               | 1.71               | 0.003                 |
|                              | Transforming Growth Factor Beta 3           | TGFB3               | 1.67               | 0.001                 |
|                              | Interleukin 4                               | IL4                 | 1.57               | 0.000                 |
|                              | Transforming Growth Factor Beta 1           | TGFB1               | 1.49               | 0.000                 |
|                              | Transforming Growth Factor Beta 2           | TGFB2               | 1.49               | 0.007                 |
|                              | Transforming Growth Factor Beta Induced     | TGFBI               | 1.46               | 0.041                 |
|                              | Interleukin 36 Receptor Antagonist          | IL1F5               | 1.45               | 0.003                 |
|                              | Interleukin 36, Beta                        | IL1F8               | 1.44               | 0.004                 |
|                              | Tumor Necrosis Factor Superfamily Member 11 | TNFSF11             | 1.27               | 0.021                 |
|                              | Interleukin 17A                             | IL17A               | 1.22               | 0.029                 |
|                              | Interleukin 37                              | IL1F7               | 1.22               | 0.036                 |
|                              | Fibroblast Growth Factor 5                  | FGF5                | 1.13               | 0.003                 |
| C-C Motif Chemokine Ligand 4 | CCL4                                        | 1.07                | 0.004              |                       |

**Supplementary Table 2: List of antibodies with their sources and experimental conditions.**

| Protein                  | Species | Application | Manufacturer | Catalog No. | Dilution |
|--------------------------|---------|-------------|--------------|-------------|----------|
| anti-ZEB1                | Rabbit  | IHC         | Abcam        | ab87280     | 1:100    |
|                          |         | IB          | Santa Cruz   | sc-25388    | 1:1000   |
| anti-NICD                | Rabbit  | IB          | CST          | #4147       | 1:1000   |
|                          |         | IP          |              |             | 1:200    |
|                          |         | ChIP        |              |             |          |
|                          |         | IF/IHC      | Abcam        | ab8925      | 1:100    |
| anti-CBF-1               | Rabbit  | IP          | Abcam        | ab25949     | 5µg/ml   |
|                          |         | CHIP        |              |             | 2ug      |
|                          | Mouse   | IB          | Proteintech  | 66132-1-Ig  | 1µg/ml   |
| anti-JAG1                | Goat    | WB          | Santa Cruz   | sc-6011     | 1:500    |
| anti-NOTCH1              | Rabbit  | WB          | Proteintech  | 20687-1-AP  | 1:1000   |
| anti-NOTCH 2             | Rabbit  | WB          | CST          | #5732       | 1:1000   |
| anti-NOTCH 3             | Rabbit  | WB          | Proteintech  | 55114-1-AP  | 1:1000   |
| anti-DLL4                | Rabbit  | WB          | Proteintech  | 21584-1-AP  | 1:1000   |
| anti-α-SMA               | Rabbit  | IF          | Proteintech  | 14395-1-AP  | 1:100    |
| anti-CD31                | Rat     | IF          | BD           | 553370      | 1:100    |
| anti-CD31                | Rabbit  | IHC         | Abcam        | ab28364     | 1:100    |
| anti-CD31-APC            | Rat     | FC          | BD           | 551262      | 1:100    |
| anti-EpCAM-A<br>PC       | Rat     | FC          | BD           | 563478      | 1:100    |
| anti-ALDH1A1             | Mouse   | IHC         | Santa Cruz   | sc-374149   | 1:100    |
|                          |         | IF          |              |             |          |
| anti-CD44-APC            | Mouse   | FC          | BD           | 559942      | 1:100    |
| anti-CD24-PE             | Mouse   | FC          | BD           | 555428      | 1:100    |
| anti-CD44-PE             | Rat     | FC          | BD           | 561860      | 1:100    |
| anti-CD24-APC            | Rat     | FC          | BD           | 562349      | 1:100    |
| Anti-CD44                | Rabbit  | IF          | Invitrogen   | 701406      | 1:100    |
| anti-SOX2                | Rabbit  | IB          | CST          | #3579       | 1:1000   |
| anti-OCT4                | Rabbit  | IB          | CST          | #2750       | 1:1000   |
| anti-NANOG               | Rabbit  | IB          | CST          | #4903       | 1:1000   |
| anti-VEGFA               | Rabbit  | IHC         | Proteintech  | 19003-1-AP  | 1:100    |
| anti-HES1                | Rabbit  | IB          | CST          | #11988      | 1:1000   |
| anti-E-cadherin          | Mouse   | IF          | CST          | #14472      | 1:50     |
|                          |         | IHC         |              |             | 1:100    |
| anti-Vimentin            | Rabbit  | IF/IHC      | CST          | #5741       | 1:100    |
| anti-Ki-67               | Rabbit  | IHC         | CST          | #9027       | 1:400    |
| anti-β-actin             | Mouse   | IB          | Santa Cruz   | sc-47778    | 1:1000   |
| anti-Phalloidin-<br>FITC |         | IF          | Sigma        | P5282       | 5µg/ml   |
| Dextran                  |         |             | Invitrogen   | D1822       | 10mg/ml  |

|                                                          |      |    |         |          |       |
|----------------------------------------------------------|------|----|---------|----------|-------|
| AlexaFluor®<br>594-conjugated<br>Goat anti-rat<br>IgG    | Goat | IF | Abcam   | ab150160 | 1:200 |
| AlexaFluor®<br>488-conjugated<br>Goat anti-rat<br>IgG    | Goat | IF | Abbkine | A23240   | 1:200 |
| AlexaFluor®<br>594-conjugated<br>Goat anti-rabbit<br>IgG | Goat | IF | Abbkine | A23420   | 1:200 |
| AlexaFluor®<br>594-conjugated<br>Goat<br>anti-mouse IgG  | Goat | IF | Abbkine | A23410   | 1:200 |

IHC: Immunohistochemistry; IB: Immunoblotting; IF: Immunofluorescence; IP:  
Immunoprecipitation; ChIP: Chromatin immunoprecipitation, FC: Flow cytometry

**Supplementary Table 3: Sequences of the oligonucleotides for shRNA, mice genotyping, real-time PCR, and site-mutagenesis.**

| Construction of shRNA vector               |                                                                   |
|--------------------------------------------|-------------------------------------------------------------------|
| shZeb1-1                                   | 5'-CGGCGCAATAACGTTACAAAT-3'                                       |
| shZeb1-2                                   | 5'-GGCGCAATAACGTTACAAA-3'                                         |
| shZeb1-3                                   | 5'-CCTCTCTGAAAGAACACATTA-3'                                       |
| shJag1-1                                   | 5'-CGCGTGACCTGTGATGACTACTACT-3'                                   |
| shJag1-2                                   | 5'-TAAGAGTTCAGAGGCGGCCTCTGAA-3'                                   |
| shJag1-3                                   | 5'-GGACATCGATTATTGTGAGCCTAAT-3'                                   |
| shDll4-1                                   | 5'-GGGCTGTCATGAACAGAAT-3'                                         |
| shDll4-2                                   | 5'-GCTGGTCTTCAGAAATCAA-3'                                         |
| shNotch1-1                                 | 5'-GGAGCATGTGTAACATCAA-3'                                         |
| shNotch1-2                                 | 5'-GGGACATCACGGATCATAT-3'                                         |
| shNotch2-1                                 | 5'-GGGTATGAAATCATCCTTAT-3'                                        |
| shNotch2-2                                 | 5'-GCTCTGATGTTGTGGTTTA-3'                                         |
| shNotch3-1                                 | 5'-GCAGATGTATGCATTCCTT-3'                                         |
| shNotch3-2                                 | 5'-GCTTGGGAAATCAGCCTTA-3'                                         |
| Construction of <i>Zeb1</i> promoter       |                                                                   |
| -373-forward                               | 5'-TATTACTCATTCCGCTCTAC-3'                                        |
| -572-forward                               | 5'-AAGGTCCTGCACGGCGATGA-3'                                        |
| -947-forward                               | 5'-TACTATGTGTCATTGTGCTA-3'                                        |
| -1389-forward                              | 5'-CCAAGCAAAGCAAGGACACC-3'                                        |
| -1915-forward                              | 5'-GGATGAAGGCAGATTATGTA-3'                                        |
| reverse                                    | 5'-GGCTGTCCGAGTTGGAAAGGTAAAG-3'                                   |
| Site-Directed Mutagenesis of ZEB1 promoter |                                                                   |
| NRE-I forward                              | 5'-GATTTAGGTTTCCTTCCTGCTTAACACCTCCTTCGAAT<br>AAGGAAAC-3'          |
| NRE-I reverse                              | 5'-GTTTCCTTATTCGAAGGAGGTG <b>TT</b> AAGCAGGAAGGA<br>AACCTAAATC-3' |
| NRE-II forward                             | 5'-TAGAGCGGAATGAGTAATAAACACACGGTGCTTGTCT<br>CAC-3'                |
| NRE-II reverse                             | 5'-GTGAGACAAGCACCGTGTG <b>TTT</b> TATTACTCATTCCGCT<br>CTA-3'      |
| Mice genotyping                            |                                                                   |
| PyMT-F                                     | 5'-GGAAGCAAGTACTTCACAAGGG-3'                                      |
| PyMT-R                                     | 5'-GGAAAGTCACTAGGAGCAGGG-3'                                       |
| Cre-F                                      | 5'-ATTTGCCTGCATTACCGGTC-3'                                        |
| Cre-R                                      | 5'-ATCAACGTTTTCTTTTCG G-3'                                        |
| Zeb1-LoxP-F                                | 5'-GTCTATCCAGAATCTTCCCATGAC-3'                                    |
| Zeb1-LoxP-R                                | 5'-CTGTCAATCTCTGGCCTCTACATG-3'                                    |
| Rea-Time PCR                               |                                                                   |
| human Zeb1 forward                         | 5'-CAGCTTGATACCTGTGAATGGG-3'                                      |

|                       |                             |
|-----------------------|-----------------------------|
| human Zeb1 reverse    | 5'-TATCTGTGGTCGTGTGGGACT-3' |
| human Jag1 forward    | 5'-AATGGTTATCGCTGTATCTG-3'  |
| human Jag1 reverse    | 5'-TCACTGGCACGGTTGTAG-3'    |
| human Dll4 forward    | 5'-GGATGAGCAAACCAGCAC-3'    |
| human Dll4 reverse    | 5'-ATGACAGCCCCGAAAGACA-3'   |
| human Notch1 forward  | 5'-ATGTTGGAGAAGGGAAGTTG-3'  |
| human Notch1 reverse  | 5'-GCAGGTGATGCTGGTGGGA-3'   |
| human Notch2 forward  | 5'-TTGATGATTGTGCCTTCG-3'    |
| human Notch2 reverse  | 5'-CCTTTGTAGCCTTGTGGG-3'    |
| human Notch3 forward  | 5'-GGATTGCCGTCAGTGGGA-3'    |
| human Notch3 reverse  | 5'-TCAGGTCGGAGATGATGCT-3'   |
| mouse Amica1 forward  | 5'-CCGCAACCGTGTAGACCTG-3'   |
| mouse Amica1 reverse  | 5'-GATGCCCTGCTGACCCTTAT-3'  |
| mouse Cd44 forward    | 5'-TTCATAAGAACAGGGATTGC-3'  |
| mouse Cd44 reverse    | 5'-AAAAACTGGAAAAAGAAAGG-3'  |
| mouse Emp2 forward    | 5'-GAGTCTGAGTGGCTTTAGGG-3'  |
| mouse Emp2 reverse    | 5'-AAGGCAACAGGTGATCGTTT-3'  |
| mouse Sectm1a forward | 5'-GCTTGCTGGAGAAGGGAC-3'    |
| mouse Sectm1a reverse | 5'-ACATCGGTGAAGGTGTTAGA-3'  |
| mouse Clu forward     | 5'-AGCCGTGCGGAATGAGATAG-3'  |
| mouse Clu reverse     | 5'-TATTGGATTAGTTGCGTGGG-3'  |
| mouse Sox4 forward    | 5'-AAGAAAAGGAAGAAAAAGT-3'   |
| mouse Sox4 reverse    | 5'-CCACCAACATCAATAACAA-3'   |
| Quantitative ChIP     |                             |
| NRE-I(-863) forward   | 5'-AACTGCTACATTGTTAAT-3'    |
| NRE-I(-698) reverse   | 5'-AATATCAAGAAAGTCGTC-3'    |
| NRE-II(-521) forward  | 5'-GATACCTTAGCTCTGAGT-3'    |
| NRE-II(-326) reverse  | 5'-AGAAGTTCCGCTTGCCAG-3'    |
